# Supplementary material
Source: Springer Nature journal article supplement (https://www.springermedizin.de/resource/supplementary/12936_2009_1165_MOESM3_ESM.pdf/9550024)
Supplement: MOESM3 [file 9550024]

**427 Households Monitored**

**218**  
Interceptor  
Long-Lasting  
Insecticidal Nets  
(LLINs)

**209**  
Conventionally  
Treated Nets (CTNs)

**10 Protocol Violations**  
2 = No consent  
4 = No net/not randomized  
3 = Randomization Error  
1 = Sampled twice

**7 Protocol Violations**  
2 = No consent  
3 = No net/not randomized  
0 = Randomization Error  
2 = Sampled twice

**208 LLINs**

**202 CTNs**

**5 Misclassified**

**7 Misclassified**

**203**  
**Samples**  
**Analysed**

**195**  
**Samples**  
**Analysed**
